# Supplementary material for: Tissue-Wide Expression of Genes Related to Vitamin D Metabolism and FGF23 Signaling following Variable Phosphorus Intake in Pigs
Source: MDPI journal article supplement (doi:10.3390/metabo12080729), 2022-08-06
Supplement: s1 [file s1]

**Table S1.** Descriptive statistics and tissue-specific transcript copy numbers of the analyzed candidate genes in response to a variable dietary intake of phosphorus.

| Genes   | Tissue                 | p-value       | FC*           | L vs. H**     | Transcript copy number<br>(log2) |             |             |
|---------|------------------------|---------------|---------------|---------------|----------------------------------|-------------|-------------|
|         |                        |               |               |               | Mean                             | Min         | Max         |
| CYP2R1  | Kidney cortex          | 0.5835        | 1.10          | H>L           | 11.2                             | 10.6        | 11.9        |
|         | Kidney medulla         | 0.6192        | 1.18          | L>H           | 10.8                             | 9.2         | 11.5        |
|         | Liver                  | 0.7030        | 1.15          | L>H           | 10.2                             | 9.3         | 11.6        |
|         | Bone                   | 0.1289        | 1.32          | H>L           | 8.7                              | 8.1         | 9.2         |
|         | Duodenum               | 0.5772        | 1.09          | L>H           | 12.4                             | 11.9        | 13.1        |
|         | <b>Jejunum (Prox.)</b> | <b>0.0435</b> | <b>1.38</b>   | <b>L&gt;H</b> | <b>12.4</b>                      | <b>12.0</b> | <b>13.1</b> |
|         | Jejunum (Dist.)        | 0.3252        | 1.13          | H>L           | 12.0                             | 11.7        | 12.5        |
|         | Ileum                  | 0.3652        | 1.27          | L>H           | 12.1                             | 11.4        | 13.1        |
|         | Cecum                  | 0.3178        | 1.32          | H>L           | 11.6                             | 10.6        | 12.3        |
|         | Colon (Prox.)          | 0.6857        | 1.25          | H>L           | 9.4                              | 8.0         | 11.3        |
|         | Colon (Dist.)          | 0.2623        | 1.34          | H>L           | 12.0                             | 11.0        | 12.6        |
|         | <b>Kidney cortex</b>   | <b>0.0000</b> | <b>2.06</b>   | <b>L&gt;H</b> | <b>13.1</b>                      | <b>12.1</b> | <b>14.2</b> |
|         | Kidney medulla         | 0.5962        | 1.27          | H>L           | 10.7                             | 9.0         | 12.3        |
| CYP27A1 | Liver                  | 0.9242        | 1.01          | H>L           | 16.8                             | 16.2        | 17.1        |
|         | Bone                   | 0.2088        | 1.46          | H>L           | 11.2                             | 10.7        | 12.7        |
|         | Duodenum               | 0.6819        | 1.16          | L>H           | 11.9                             | 10.7        | 13.0        |
|         | Jejunum (Prox.)        | 0.4500        | 1.62          | L>H           | 11.7                             | 9.6         | 13.3        |
|         | Jejunum (Dist.)        | 0.9381        | 1.03          | L>H           | 10.4                             | 9.3         | 11.3        |
|         | Ileum                  | 0.4076        | 1.47          | L>H           | 9.8                              | 8.3         | 11.8        |
|         | Cecum                  | 0.4243        | 1.32          | H>L           | 9.6                              | 8.3         | 10.7        |
|         | <b>Colon (Prox.)</b>   | <b>0.0333</b> | <b>2.39</b>   | <b>L&gt;H</b> | <b>9.6</b>                       | <b>8.2</b>  | <b>11.6</b> |
|         | Colon (Dist.)          | 0.6896        | 1.10          | L>H           | 10.5                             | 9.8         | 11.2        |
|         | Kidney cortex          | 1.0000        | 1.00          | H>L           | 14.8                             | 14.1        | 15.5        |
|         | Kidney medulla         | 0.9314        | 1.07          | H>L           | 10.2                             | 8.2         | 13.6        |
|         | Liver                  | 0.5868        | 1.23          | L>H           | 6.0                              | 5.0         | 7.7         |
|         | <b>Bone</b>            | <b>0.0032</b> | <b>2.39</b>   | <b>H&gt;L</b> | <b>7.3</b>                       | <b>6.5</b>  | <b>8.6</b>  |
| CYP27B1 | Duodenum               | 0.6865        | 1.18          | H>L           | 7.0                              | 5.4         | 7.9         |
|         | Jejunum (Prox.)        | 0.0917        | 1.82          | L>H           | 6.7                              | 4.9         | 7.7         |
|         | Jejunum (Dist.)        | 0.7975        | 1.09          | L>H           | 6.7                              | 5.7         | 7.7         |
|         | Ileum                  | 0.1259        | 1.20          | L>H           | 7.0                              | 6.6         | 7.5         |
|         | Cecum                  | 0.5330        | 1.20          | H>L           | 8.0                              | 7.0         | 8.8         |
|         | Colon (Prox.)          | 0.1812        | 1.47          | L>H           | 6.7                              | 5.4         | 7.4         |
|         | Colon (Dist.)          | 0.1020        | 1.27          | H>L           | 8.0                              | 7.5         | 8.5         |
|         | <b>Kidney cortex</b>   | <b>0.0321</b> | <b>2.79</b>   | <b>H&gt;L</b> | <b>13.3</b>                      | <b>11.8</b> | <b>15.3</b> |
|         | Kidney medulla         | 0.7551        | 1.21          | H>L           | 8.9                              | 6.8         | 11.4        |
|         | Bone                   | 0.3964        | 2.43          | L>H           | 7.0                              | 2.6         | 9.3         |
|         | <b>Duodenum</b>        | <b>0.0028</b> | <b>34.78</b>  | <b>L&gt;H</b> | <b>5.1</b>                       | <b>0.5</b>  | <b>8.6</b>  |
|         | Jejunum (Prox.)        | 0.2339        | 11.96         | L>H           | 7.0                              | 1.1         | 15.1        |
|         | <b>Jejunum (Dist.)</b> | <b>0.0030</b> | <b>106.52</b> | <b>L&gt;H</b> | <b>6.4</b>                       | <b>0.6</b>  | <b>11.2</b> |
| CYP24A1 | <b>Ileum</b>           | <b>0.0140</b> | <b>16.22</b>  | <b>L&gt;H</b> | <b>4.4</b>                       | <b>0.8</b>  | <b>8.4</b>  |

|       |                 |               |             |               |            |            |            |
|-------|-----------------|---------------|-------------|---------------|------------|------------|------------|
| VDR   | Cecum           | 0.5859        | 1.68        | L>H           | 3.3        | 1.3        | 5.7        |
|       | Kidney cortex   | 0.0720        | 1.72        | H>L           | 13.0       | 12.2       | 13.8       |
|       | Kidney medulla  | 0.8721        | 1.09        | L>H           | 10.5       | 9.0        | 12.0       |
|       | Liver           | 0.5363        | 1.15        | H>L           | 4.3        | 3.8        | 5.0        |
|       | Bone            | 0.3310        | 1.14        | H>L           | 12.5       | 11.9       | 12.9       |
|       | Duodenum        | 0.1034        | 1.89        | L>H           | 15.4       | 13.9       | 16.9       |
|       | Jejunum (Prox.) | 0.9756        | 1.01        | L>H           | 15.8       | 14.7       | 17.1       |
|       | Jejunum (Dist.) | 0.1204        | 2.03        | L>H           | 14.8       | 13.9       | 16.7       |
|       | Ileum           | 0.0591        | 3.58        | L>H           | 13.8       | 11.9       | 17.2       |
|       | Cecum           | 0.9472        | 1.01        | H>L           | 13.6       | 12.8       | 14.3       |
| FGF23 | Colon (Prox.)   | 0.1275        | 1.89        | L>H           | 13.7       | 12.0       | 15.1       |
|       | Colon (Dist.)   | 0.0933        | 1.36        | H>L           | 14.3       | 13.8       | 15.2       |
|       | <b>Liver</b>    | <b>0.0116</b> | <b>5.21</b> | <b>L&gt;H</b> | <b>4.1</b> | <b>2.0</b> | <b>7.0</b> |
|       | Bone            | 0.1030        | 2.55        | H>L           | 4.4        | 2.0        | 5.5        |
| FGFR1 | Kidney cortex   | 0.1203        | 1.34        | L>H           | 11.7       | 10.9       | 12.4       |
|       | Kidney medulla  | 0.9424        | 1.03        | H>L           | 13.5       | 12.1       | 14.9       |
|       | Liver           | 0.5079        | 1.16        | H>L           | 10.1       | 9.5        | 11.1       |
|       | Bone            | 0.1314        | 1.51        | H>L           | 14.3       | 13.7       | 15.6       |
|       | Duodenum        | 0.6125        | 1.30        | H>L           | 10.3       | 8.3        | 11.7       |
|       | Jejunum (Prox.) | 0.9424        | 1.04        | H>L           | 10.2       | 8.6        | 11.6       |
|       | Jejunum (Dist.) | 0.6406        | 1.20        | H>L           | 10.9       | 9.4        | 11.9       |
|       | Ileum           | 0.4649        | 1.38        | H>L           | 10.2       | 8.4        | 11.5       |
|       | Cecum           | 0.8850        | 1.04        | L>H           | 11.6       | 10.5       | 12.6       |
|       | Colon (Prox.)   | 0.1297        | 1.82        | L>H           | 11.1       | 9.8        | 12.4       |
| FGFR2 | Colon (Dist.)   | 0.2248        | 1.32        | H>L           | 11.7       | 11.0       | 12.4       |
|       | Kidney cortex   | 0.3339        | 1.16        | H>L           | 10.6       | 10.2       | 11.2       |
|       | Kidney medulla  | 0.7935        | 1.06        | L>H           | 12.4       | 11.8       | 13.1       |
|       | Liver           | 0.5817        | 1.16        | H>L           | 10.8       | 9.8        | 11.6       |
|       | Bone            | 0.2599        | 1.24        | H>L           | 12.7       | 12.1       | 13.1       |
|       | Duodenum        | 0.1859        | 1.39        | H>L           | 10.5       | 9.7        | 11.1       |
|       | Jejunum (Prox.) | 0.0547        | 1.62        | L>H           | 10.6       | 9.8        | 11.5       |
|       | Jejunum (Dist.) | 0.1819        | 1.20        | H>L           | 11.2       | 10.3       | 11.8       |
|       | Ileum           | 0.7358        | 1.09        | L>H           | 10.4       | 9.5        | 11.4       |
|       | Cecum           | 0.6603        | 1.13        | H>L           | 10.7       | 9.8        | 11.6       |
| FGFR3 | Colon (Prox.)   | 0.0928        | 1.38        | L>H           | 9.5        | 8.9        | 10.8       |
|       | Colon (Dist.)   | 0.2023        | 1.18        | H>L           | 11.5       | 10.9       | 11.9       |
|       | Kidney cortex   | 0.1841        | 1.77        | L>H           | 10.8       | 8.8        | 11.9       |
|       | Kidney medulla  | 0.9658        | 1.01        | H>L           | 9.2        | 8.3        | 10.2       |
|       | Liver           | 0.7049        | 1.12        | L>H           | 10.8       | 9.5        | 11.4       |
|       | Bone            | 0.1977        | 1.19        | H>L           | 9.3        | 8.8        | 9.8        |
|       | Duodenum        | 0.1404        | 1.36        | L>H           | 9.9        | 9.2        | 10.6       |
|       | Jejunum (Prox.) | 0.2231        | 1.87        | L>H           | 10.1       | 8.3        | 11.5       |
|       | Jejunum (Dist.) | 0.5838        | 1.15        | H>L           | 10.9       | 10.3       | 11.5       |
|       | Ileum           | 0.3814        | 2.08        | L>H           | 8.7        | 6.8        | 11.3       |
|       | Cecum           | 0.7516        | 1.09        | H>L           | 9.9        | 8.9        | 10.7       |
|       | Colon (Prox.)   | 0.1268        | 1.97        | L>H           | 9.0        | 7.0        | 10.7       |
|       | Colon (Dist.)   | 0.2735        | 1.15        | H>L           | 10.5       | 10.2       | 11.0       |
|       |                 |               |             |               |            |            |            |

|              |                        |               |              |               |            |            |             |
|--------------|------------------------|---------------|--------------|---------------|------------|------------|-------------|
| <i>FGFR4</i> | Kidney cortex          | 0.6978        | 1.06         | L>H           | 12.4       | 12.0       | 12.9        |
|              | Kidney medulla         | 0.6689        | 1.15         | H>L           | 11.3       | 10.4       | 12.3        |
|              | Liver                  | 0.8050        | 1.04         | H>L           | 12.1       | 11.6       | 12.8        |
|              | <b>Bone</b>            | <b>0.0226</b> | <b>2.45</b>  | <b>H&gt;L</b> | <b>5.1</b> | <b>3.6</b> | <b>6.2</b>  |
|              | Duodenum               | 0.4862        | 1.32         | H>L           | 8.4        | 6.8        | 9.5         |
|              | Jejunum (Prox.)        | 0.1968        | 1.72         | L>H           | 8.8        | 7.4        | 9.8         |
|              | <b>Jejunum (Dist.)</b> | <b>0.0119</b> | <b>1.62</b>  | <b>H&gt;L</b> | <b>9.4</b> | <b>8.2</b> | <b>10.4</b> |
|              | Ileum                  | 0.4778        | 1.21         | H>L           | 9.5        | 8.4        | 10.1        |
|              | Cecum                  | 0.6549        | 1.15         | H>L           | 9.6        | 8.5        | 10.6        |
|              | Colon (Prox.)          | 0.0795        | 1.67         | L>H           | 9.3        | 8.0        | 10.8        |
|              | Colon (Dist.)          | 0.2199        | 1.20         | H>L           | 9.5        | 9.1        | 10.2        |
| <i>GC</i>    | Kidney cortex          | 0.3138        | 1.56         | L>H           | 11.6       | 10.1       | 13.5        |
|              | Kidney medulla         | 0.2027        | 2.14         | L>H           | 11.4       | 9.5        | 13.2        |
|              | Liver                  | 0.8525        | 1.04         | L>H           | 19.8       | 19.2       | 20.5        |
|              | Bone                   | 0.4665        | 1.87         | L>H           | 4.6        | 2.2        | 7.1         |
|              | Colon (Dist.)          | 0.8471        | 1.06         | H>L           | 2.7        | 1.8        | 3.7         |
| <i>KL</i>    | Kidney cortex          | 0.2612        | 1.56         | L>H           | 13.9       | 12.7       | 15.4        |
|              | Kidney medulla         | 0.3094        | 1.92         | L>H           | 12.1       | 10.0       | 14.4        |
|              | Liver                  | 0.1186        | 1.82         | H>L           | 3.0        | 1.3        | 3.9         |
|              | <b>Bone</b>            | <b>0.0081</b> | <b>10.16</b> | <b>H&gt;L</b> | <b>5.0</b> | <b>2.2</b> | <b>8.5</b>  |
|              | Duodenum               | 0.1250        | 1.58         | H>L           | 6.0        | 5.0        | 7.2         |
|              | Jejunum (Prox.)        | 0.0764        | 2.08         | L>H           | 5.0        | 3.7        | 6.3         |
|              | Jejunum (Dist.)        | 0.0576        | 1.45         | H>L           | 5.2        | 4.4        | 6.3         |
|              | Ileum                  | 0.6965        | 1.10         | L>H           | 4.9        | 3.6        | 5.5         |
|              | Cecum                  | 0.6730        | 1.15         | L>H           | 6.8        | 5.9        | 7.9         |
|              | Colon (Prox.)          | 0.3596        | 2.39         | L>H           | 3.3        | 0.4        | 5.2         |
|              | Colon (Dist.)          | 0.7380        | 1.09         | L>H           | 5.7        | 5.0        | 6.7         |

\*Fold change; \*\*Low (L) phosphorus vs. high (H) phosphorus diet;

**Table S2.** Analyzed nutrient composition of the experimental diets fed to offspring during grower and finisher periods.

| Diets         |       | Grower diets<br>(day 28-70) |      | Finisher diets<br>(day 71-120) |      |
|---------------|-------|-----------------------------|------|--------------------------------|------|
| Item          | Unit  | L                           | H    | L                              | H    |
| DM            | g/kg  | 901                         | 898  | 880                            | 883  |
| Crude ash     | g/kg  | 62.2                        | 66.3 | 38.9                           | 44.6 |
| Crude Protein | g/kg  | 192                         | 188  | 178                            | 175  |
| Crude fat     | g/kg  | 56.6                        | 56.2 | 28.8                           | 31.2 |
| Crude fiber   | g/kg  | 37.4                        | 36.1 | 34.9                           | 38.7 |
| Starch        | g/kg  | 364                         | 357  | 434                            | 432  |
| ME (pig)      | MJ/kg | 13.9                        | 13.8 | 13.5                           | 13.4 |
| Calcium       | g/kg  | 9.80                        | 9.08 | 6.50                           | 6.70 |
| Phosphorus    | g/kg  | 5.20                        | 7.80 | 4.12                           | 6.96 |
| Ca:P ratio    |       | 1.88                        | 1.17 | 1.58                           | 0.96 |
